# Supplementary material
Source: ML conference proceedings conference paper supplement (https://openreview.net/forum?id=rLG6KQMs42)
Supplement: supplementary_material [file attachment]

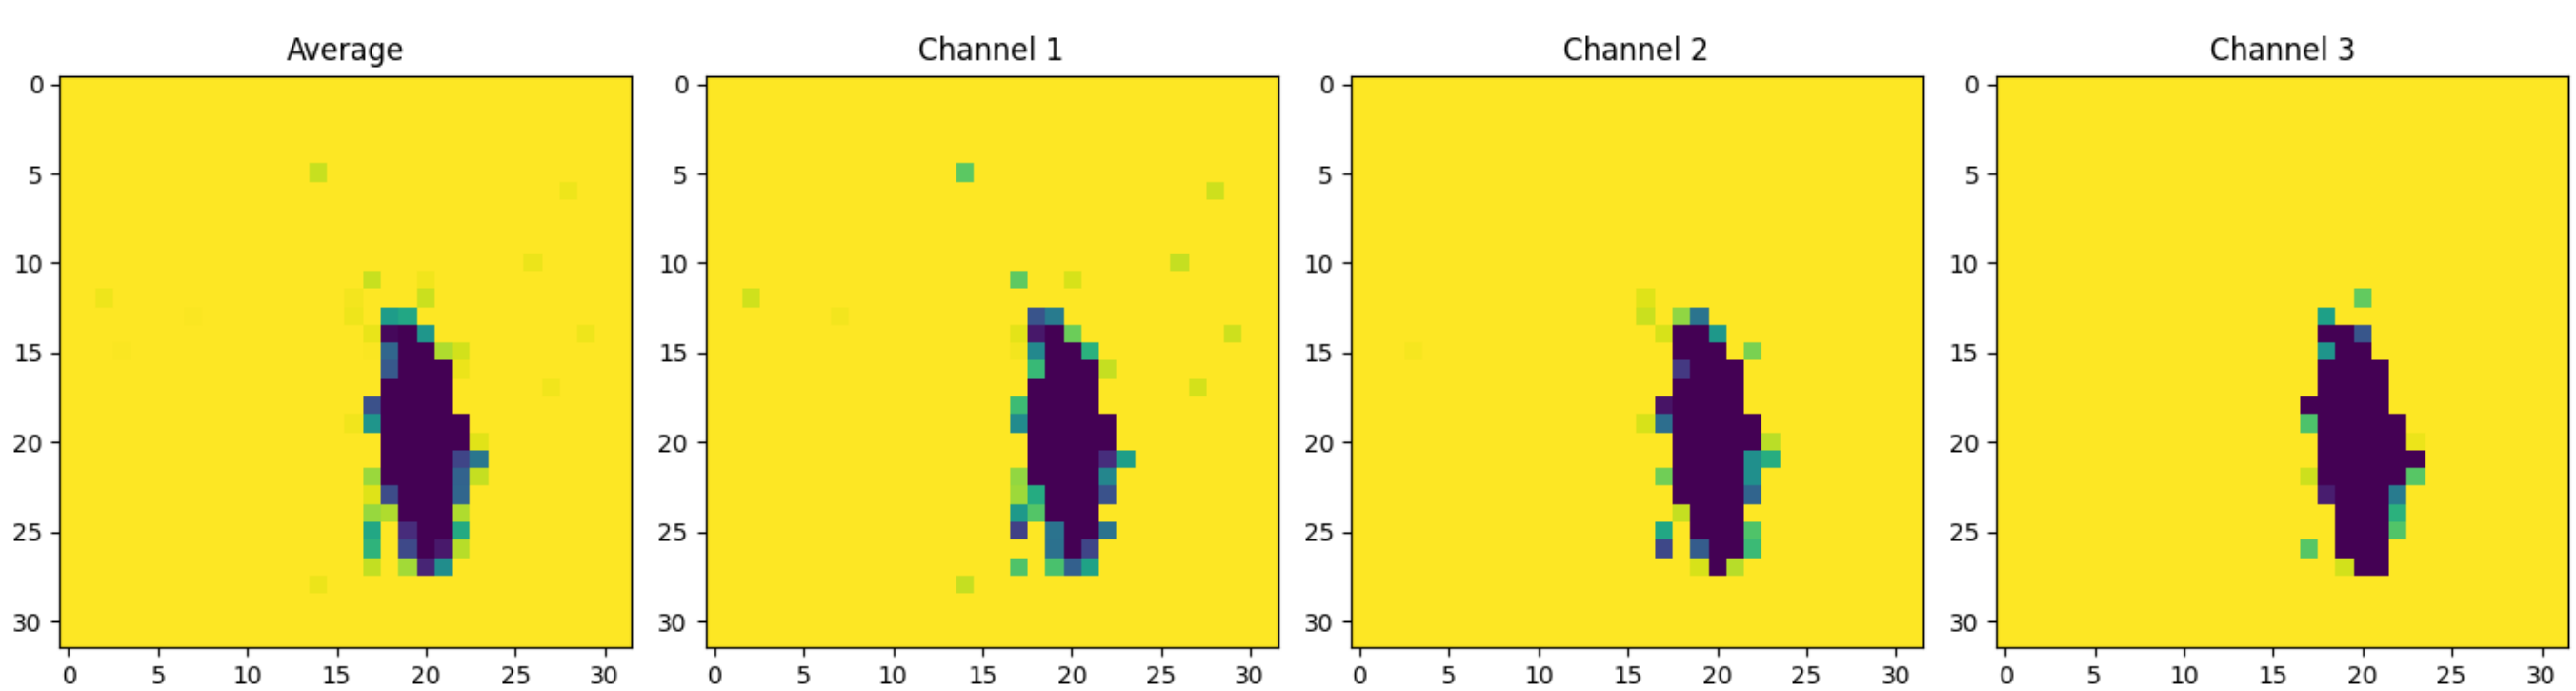

**Feature map after RS coding layer**

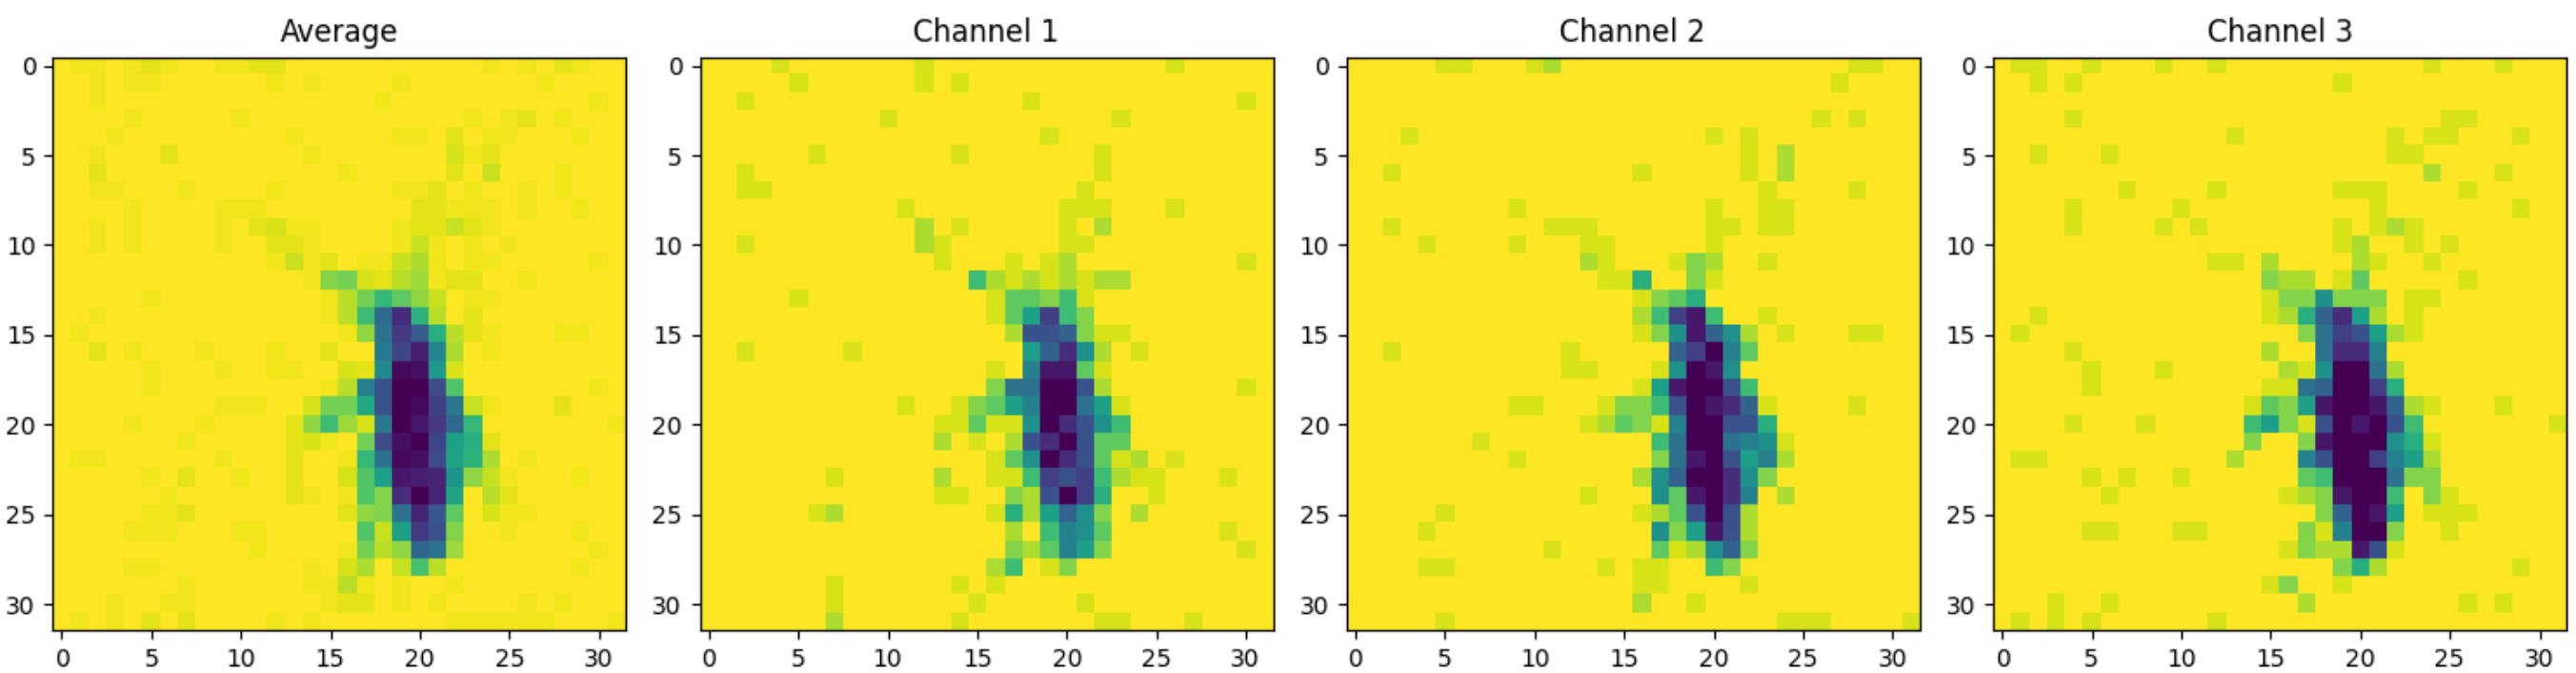

**Feature map after Poisson coding layer**

(a)

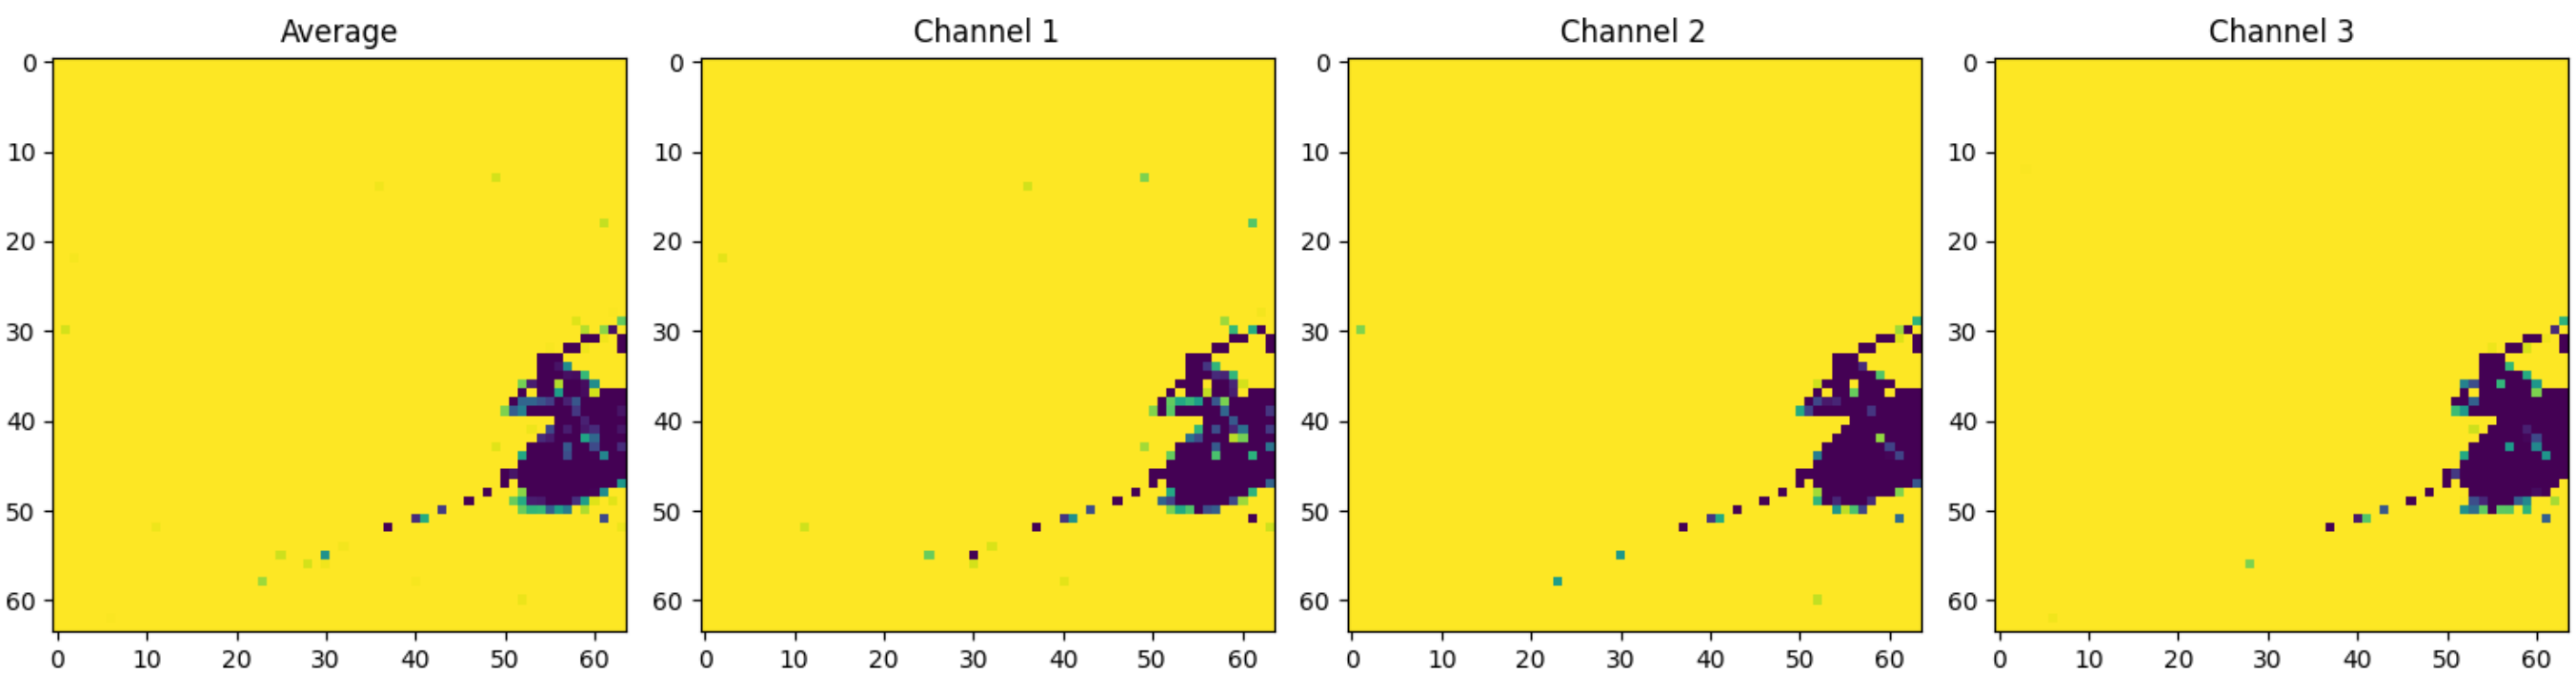

**Feature map after RS coding layer**

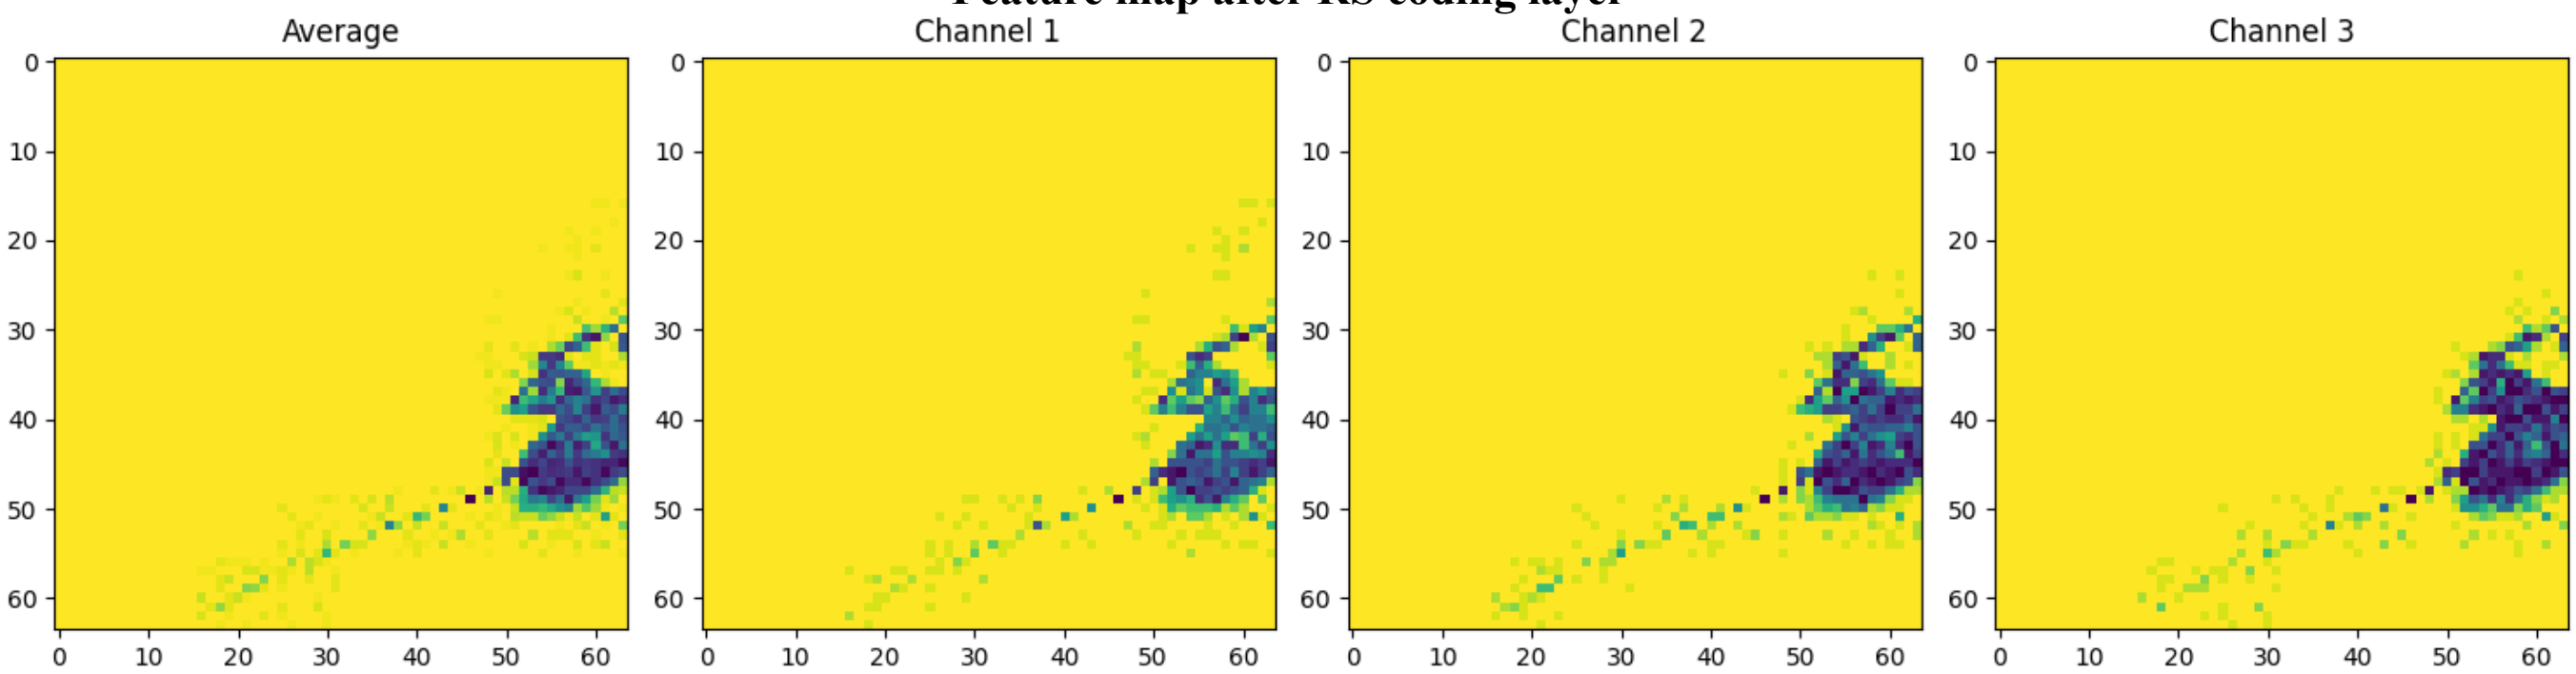

**Feature map after Poisson coding layer**

(b)
