# Supplementary material
Source: ML conference proceedings conference paper supplement (https://openreview.net/forum?id=rLG6KQMs42)

ANN

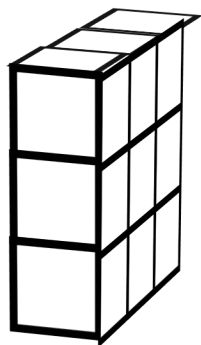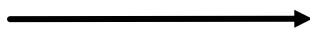

**Conv  
+  
BN**

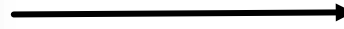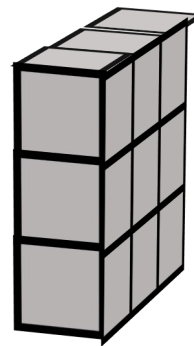

Direct Coding

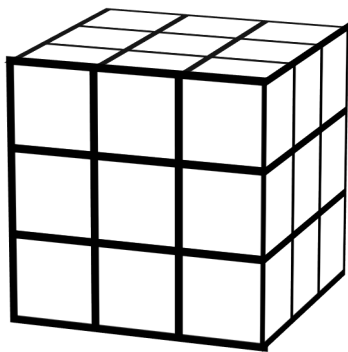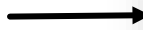

**Conv  
+  
BN**

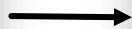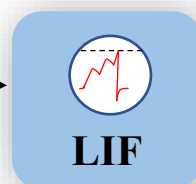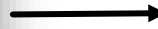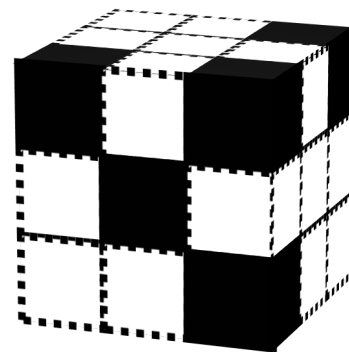

Rate Coding

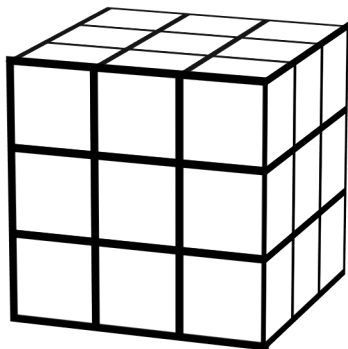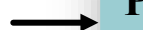

**Poisson  
Layer**

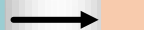

**Conv  
+  
BN**

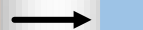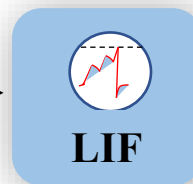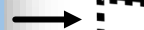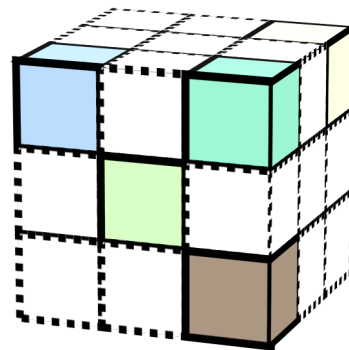

RSE (Ours)

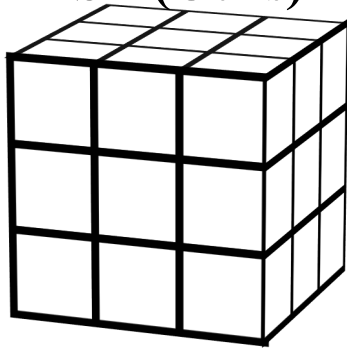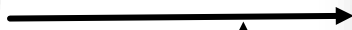

**Conv  
+  
BN**

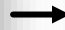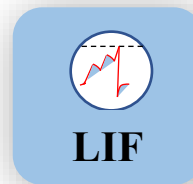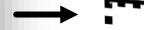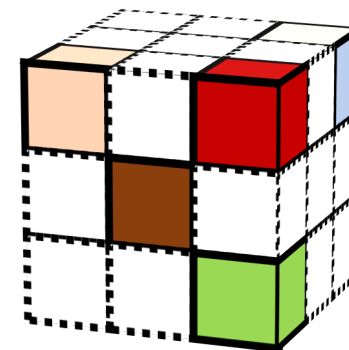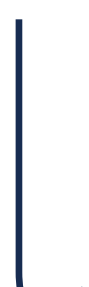

**Clamp**

**RS**

Supplement: supplementary_material [file attachment]

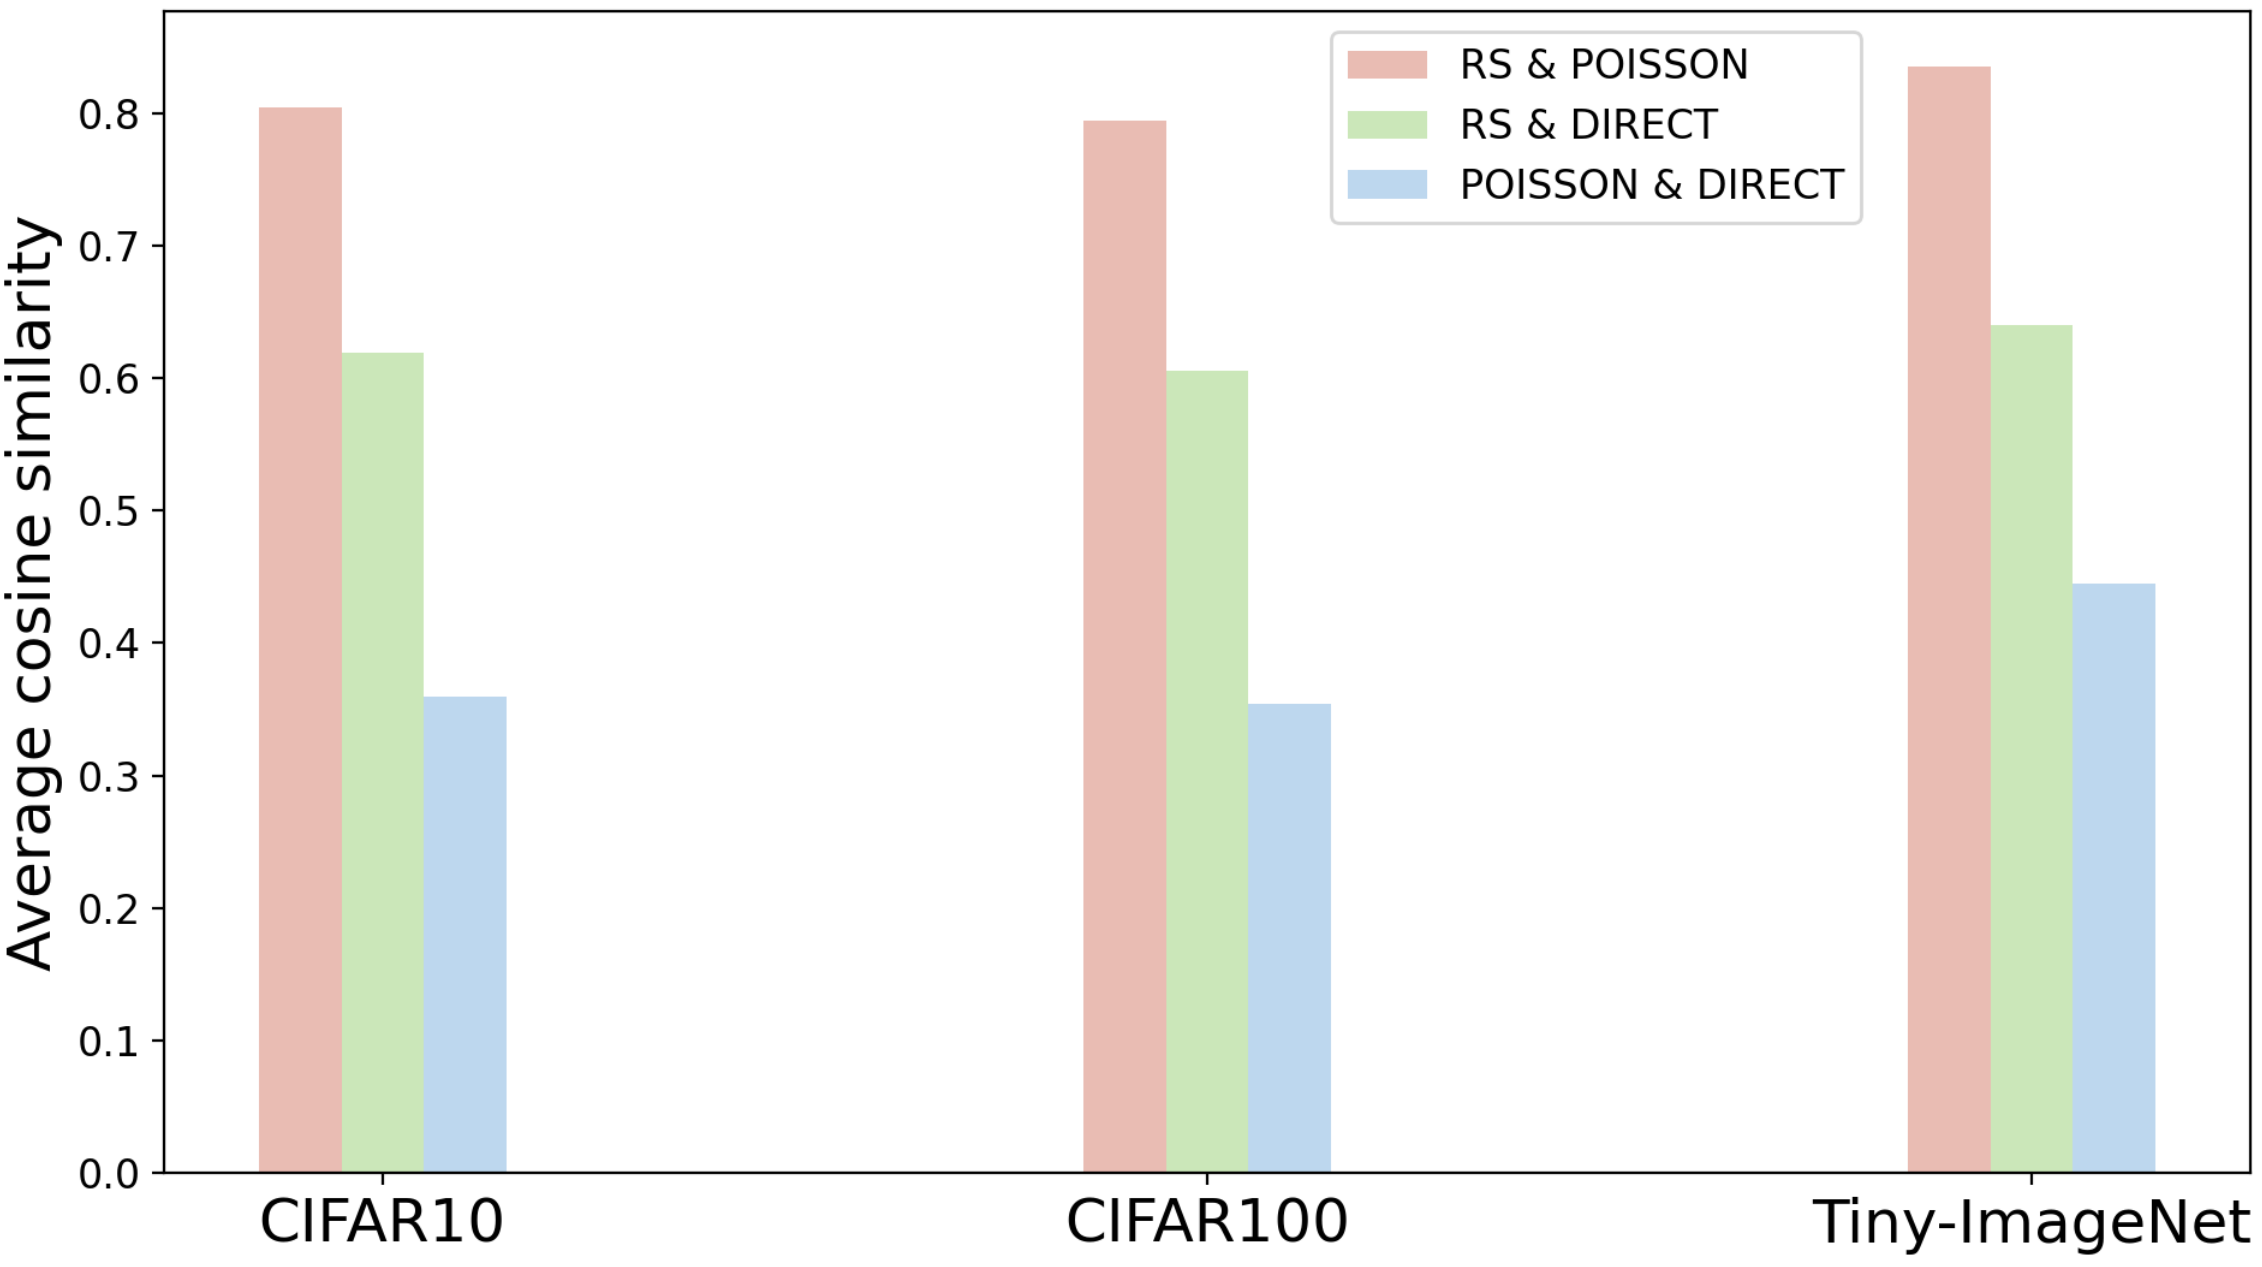

Supplement: supplementary_material [file attachment]

# Feature map after RS coding layer

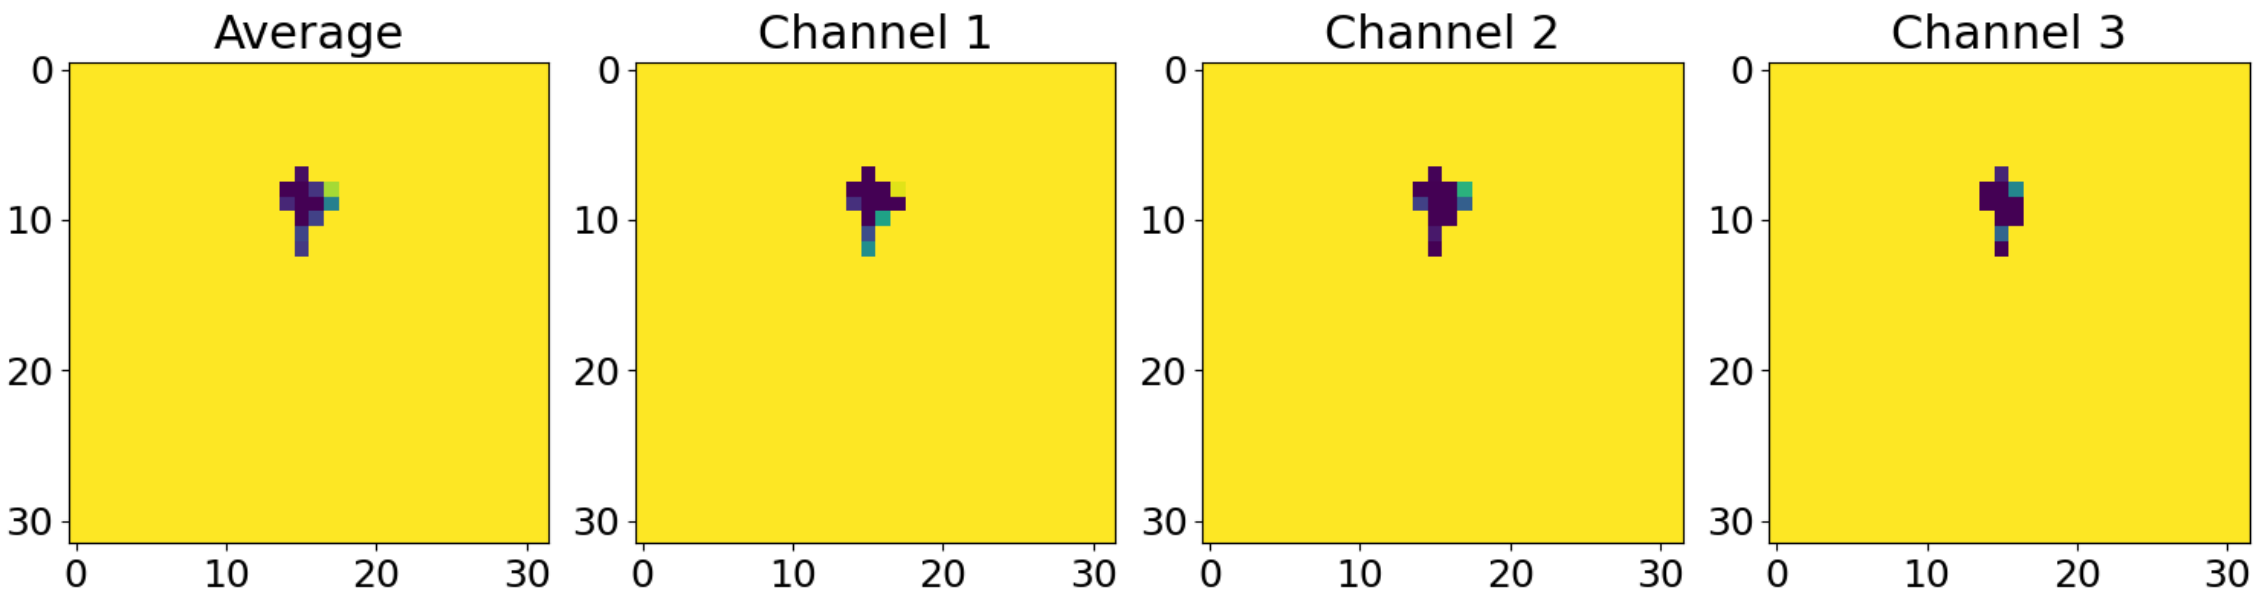

# Feature map after Poisson coding layer

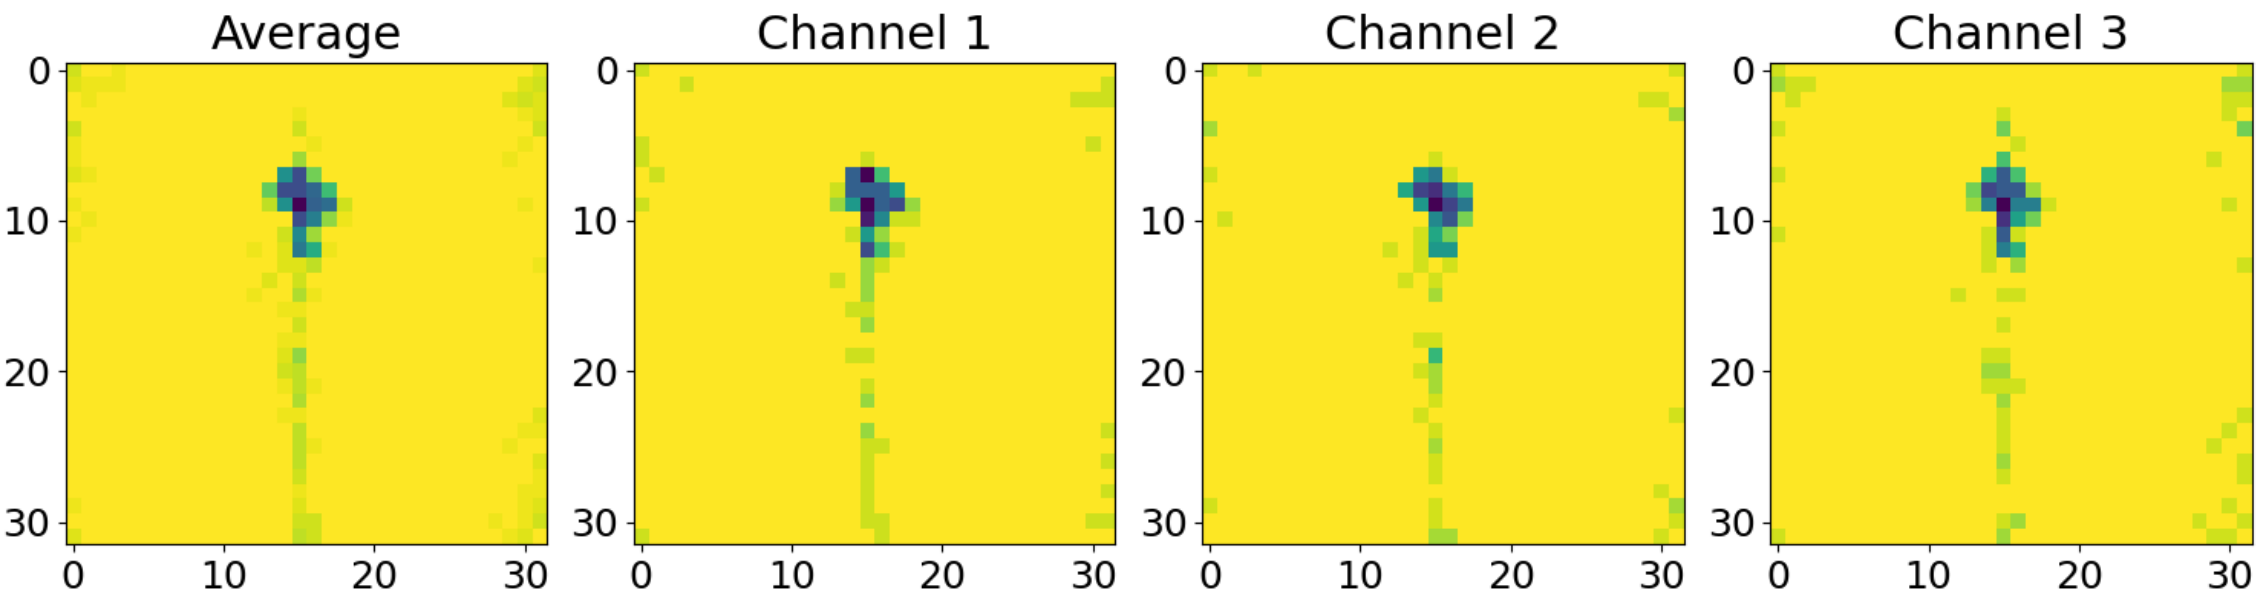

Supplement: supplementary_material [file attachment]

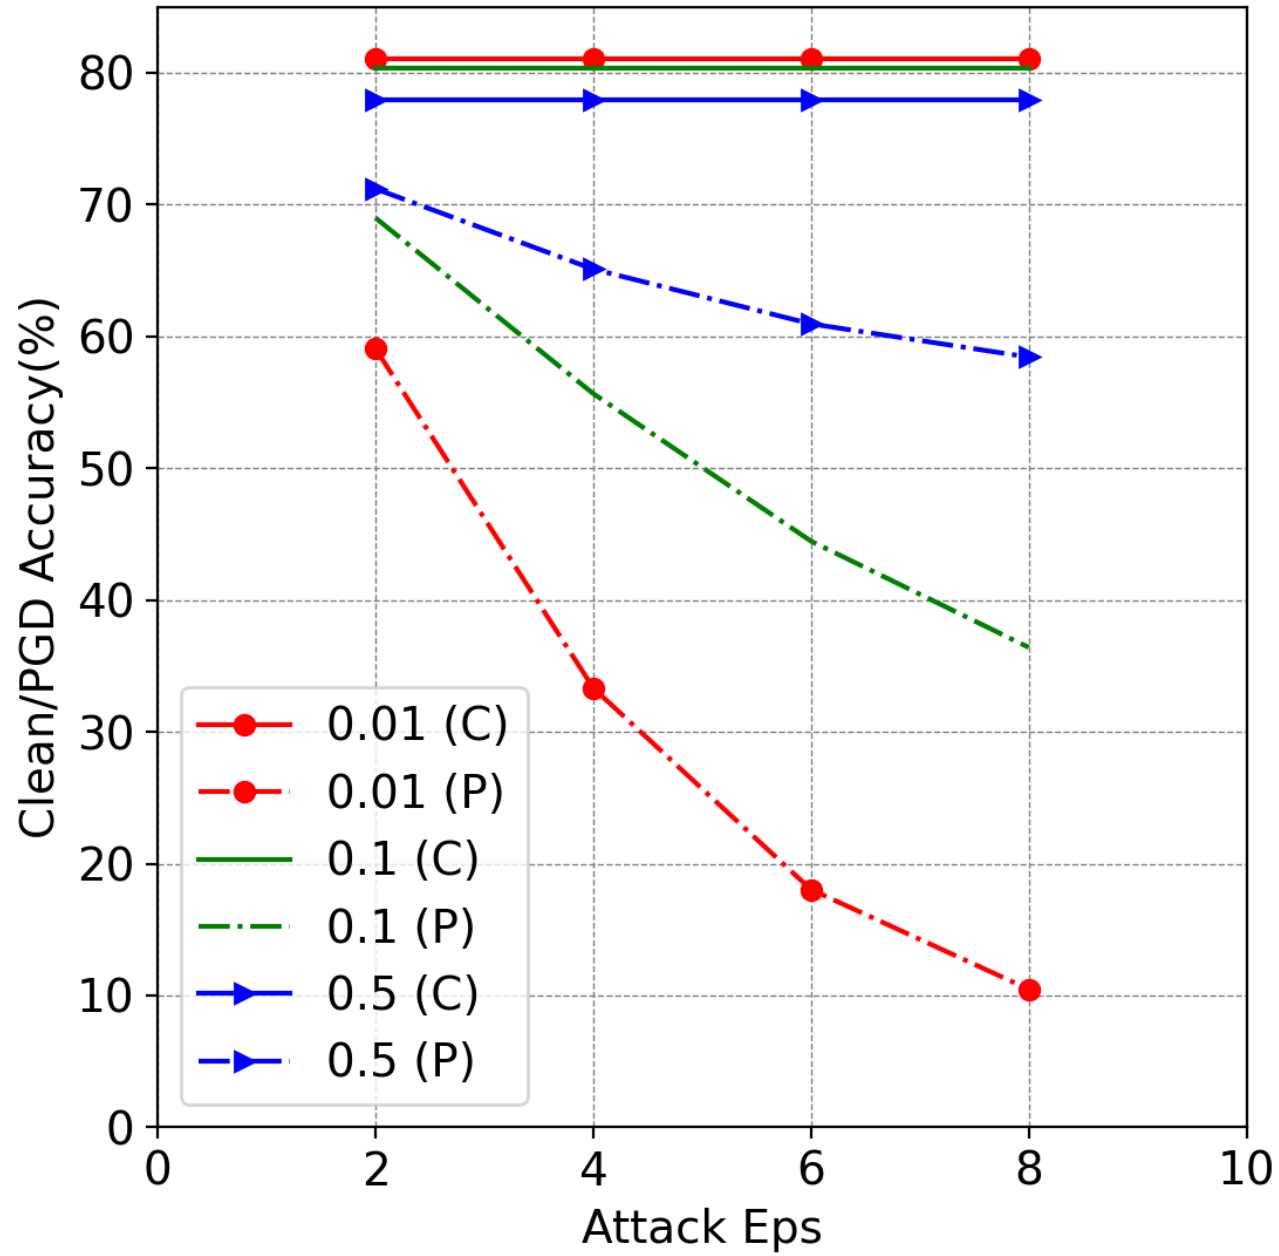

Supplement: supplementary_material [file attachment]

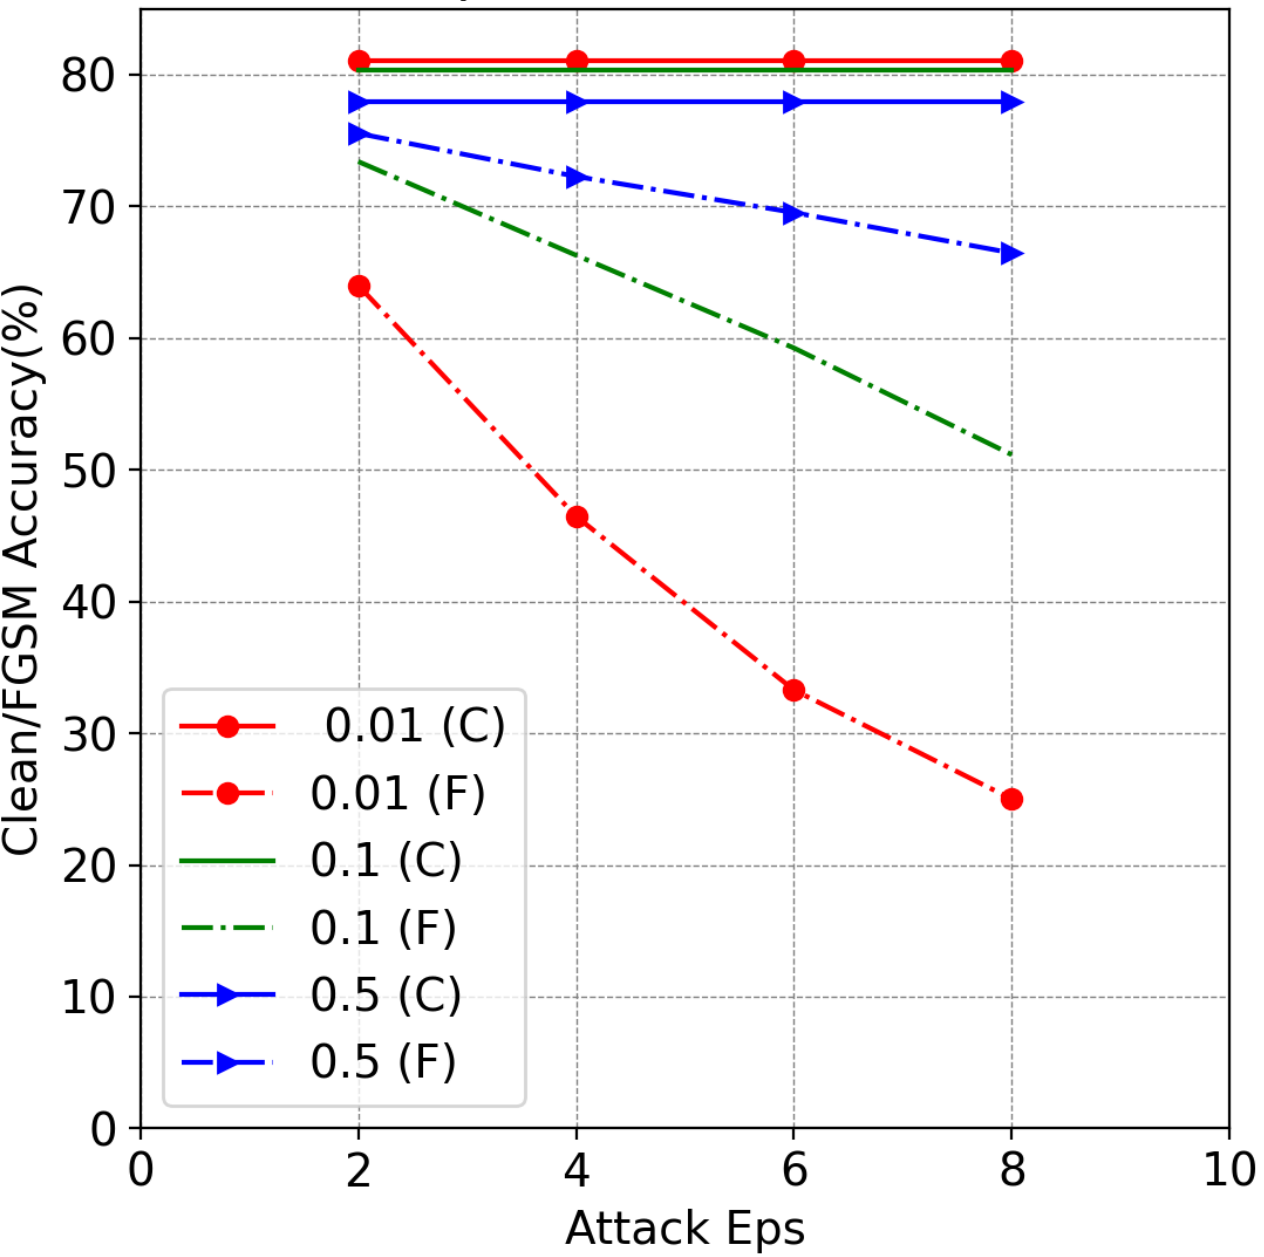

Supplement: supplementary_material [file attachment]

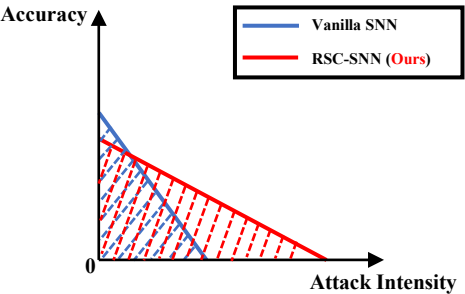

Supplement: supplementary_material [file attachment]

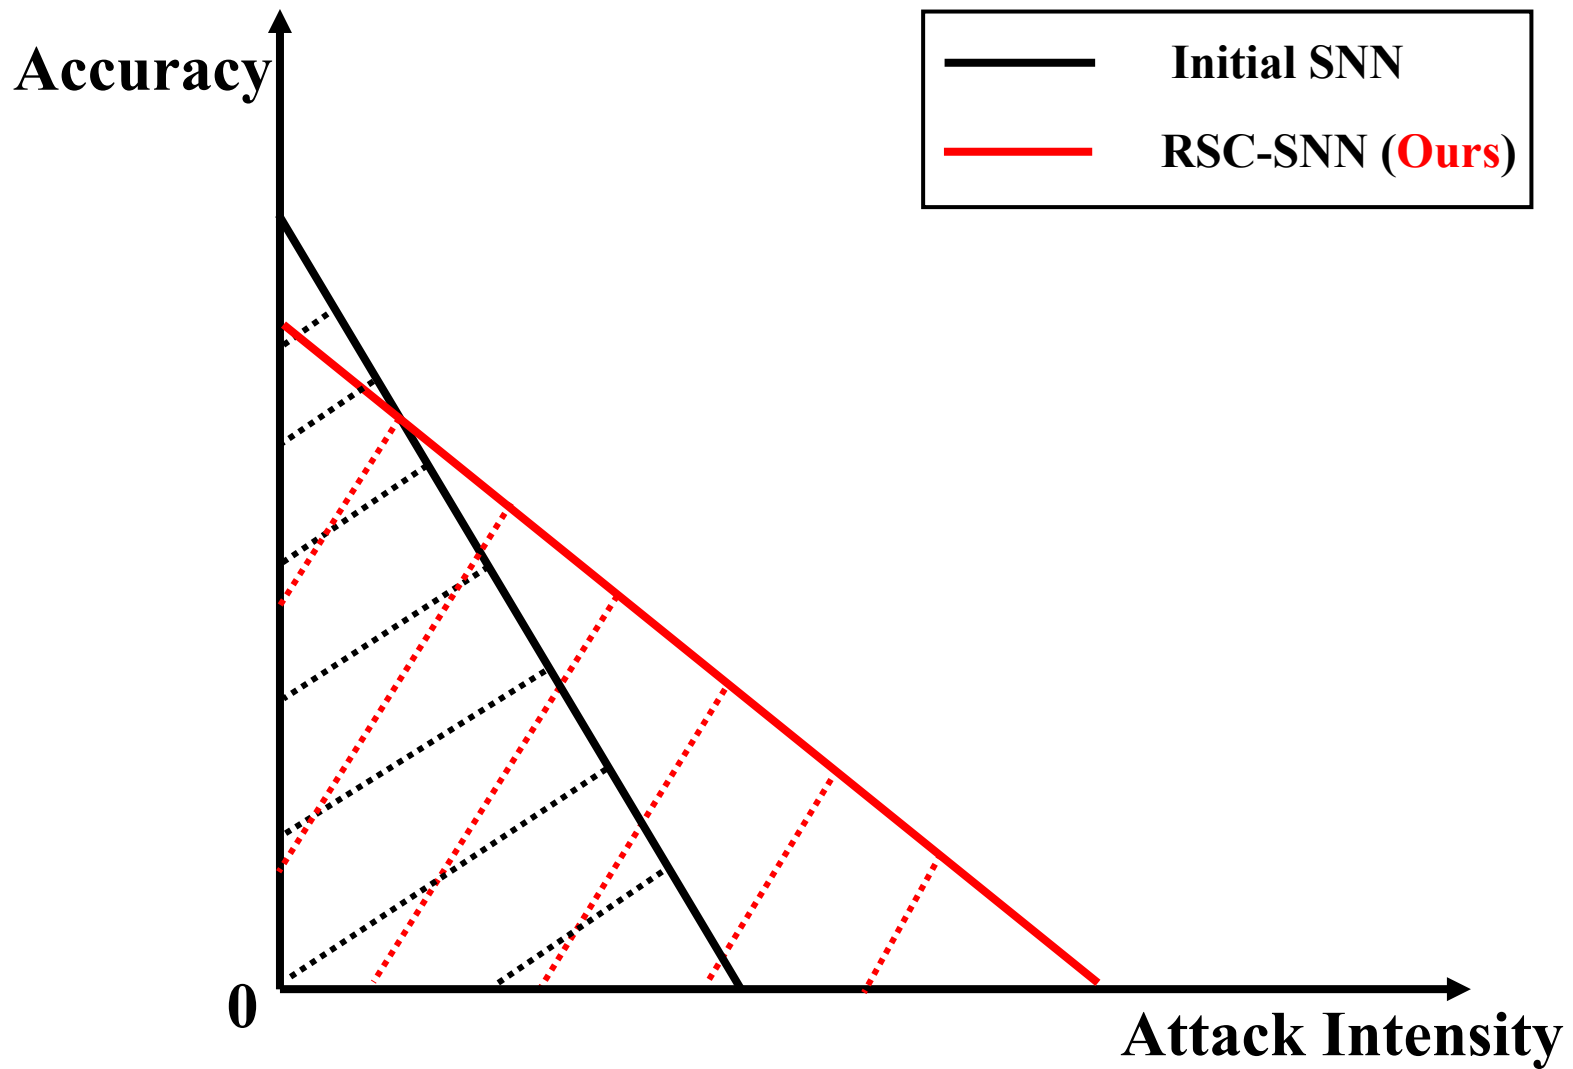

Supplement: supplementary_material [file attachment]

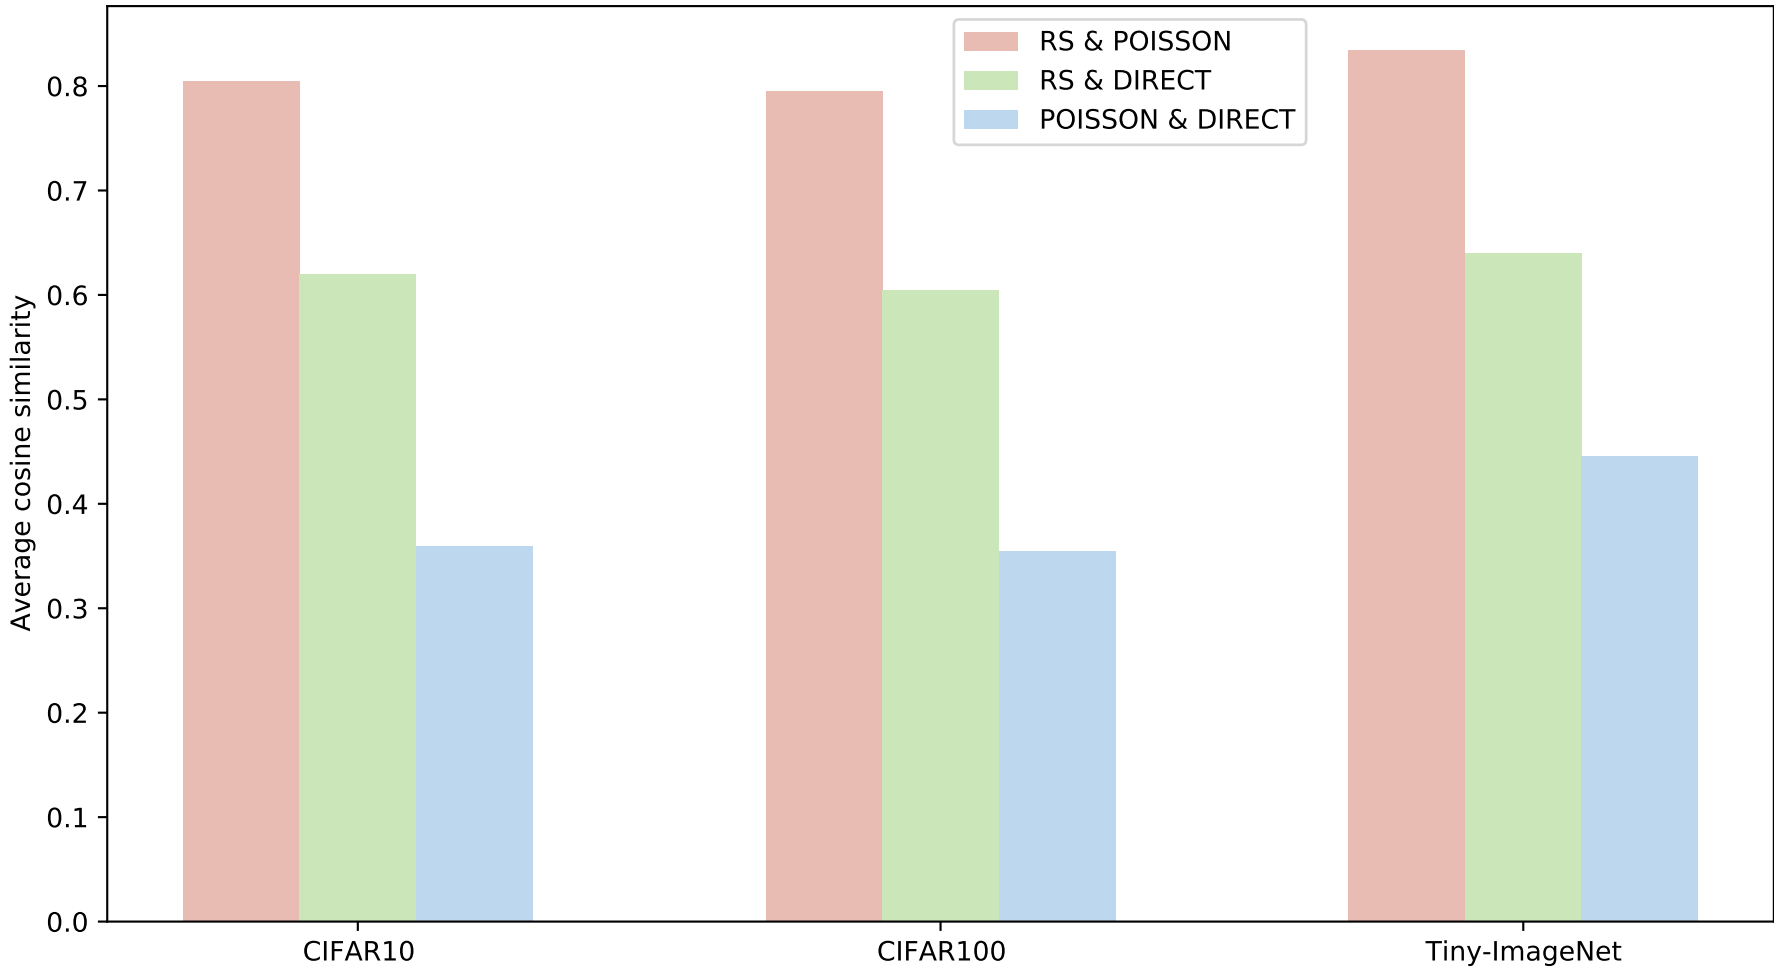

Supplement: supplementary_material [file attachment]

Ablation experiments of noise  $\sigma$  - FGSM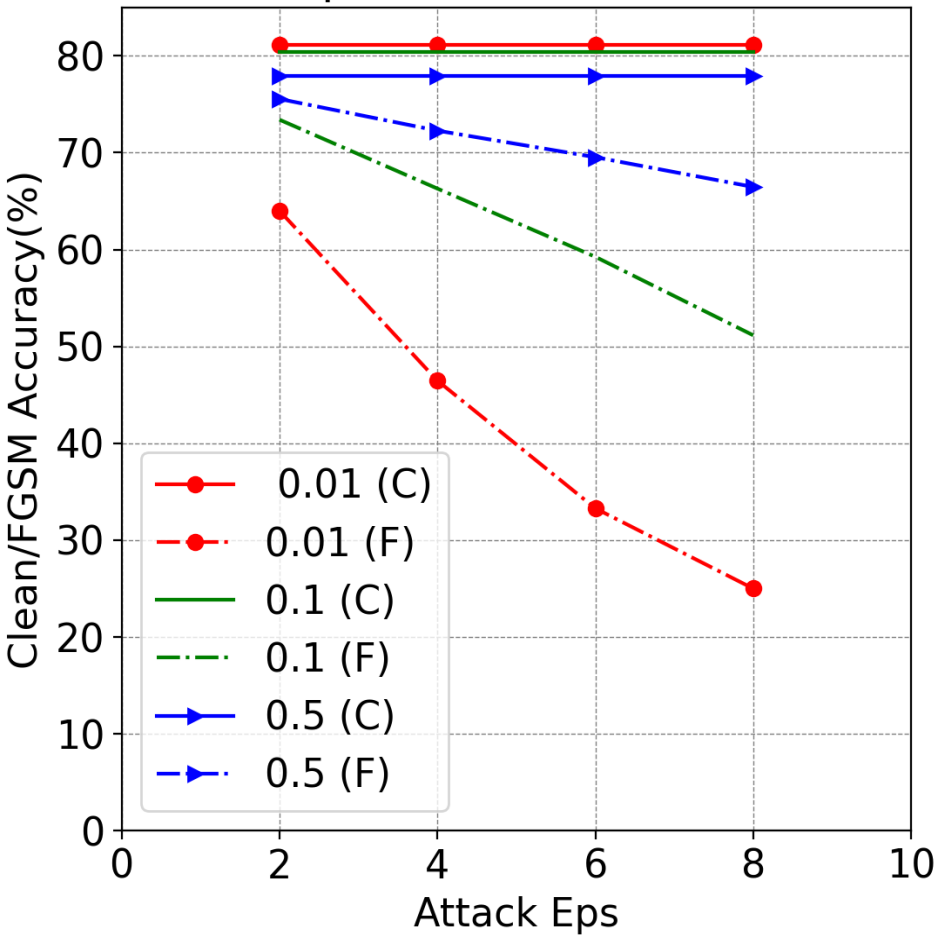

(a)

Ablation experiments of noise  $\sigma$  - PGD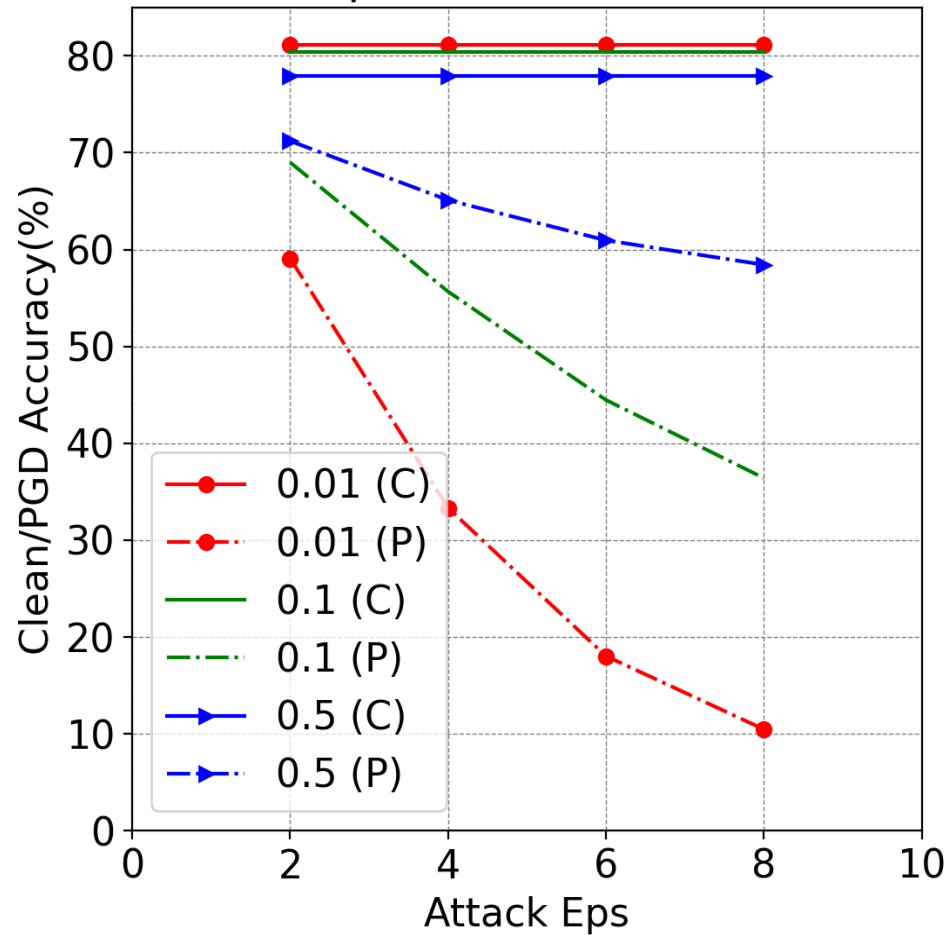

(b)

Supplement: supplementary_material [file attachment]

## Feature map after RS coding layer

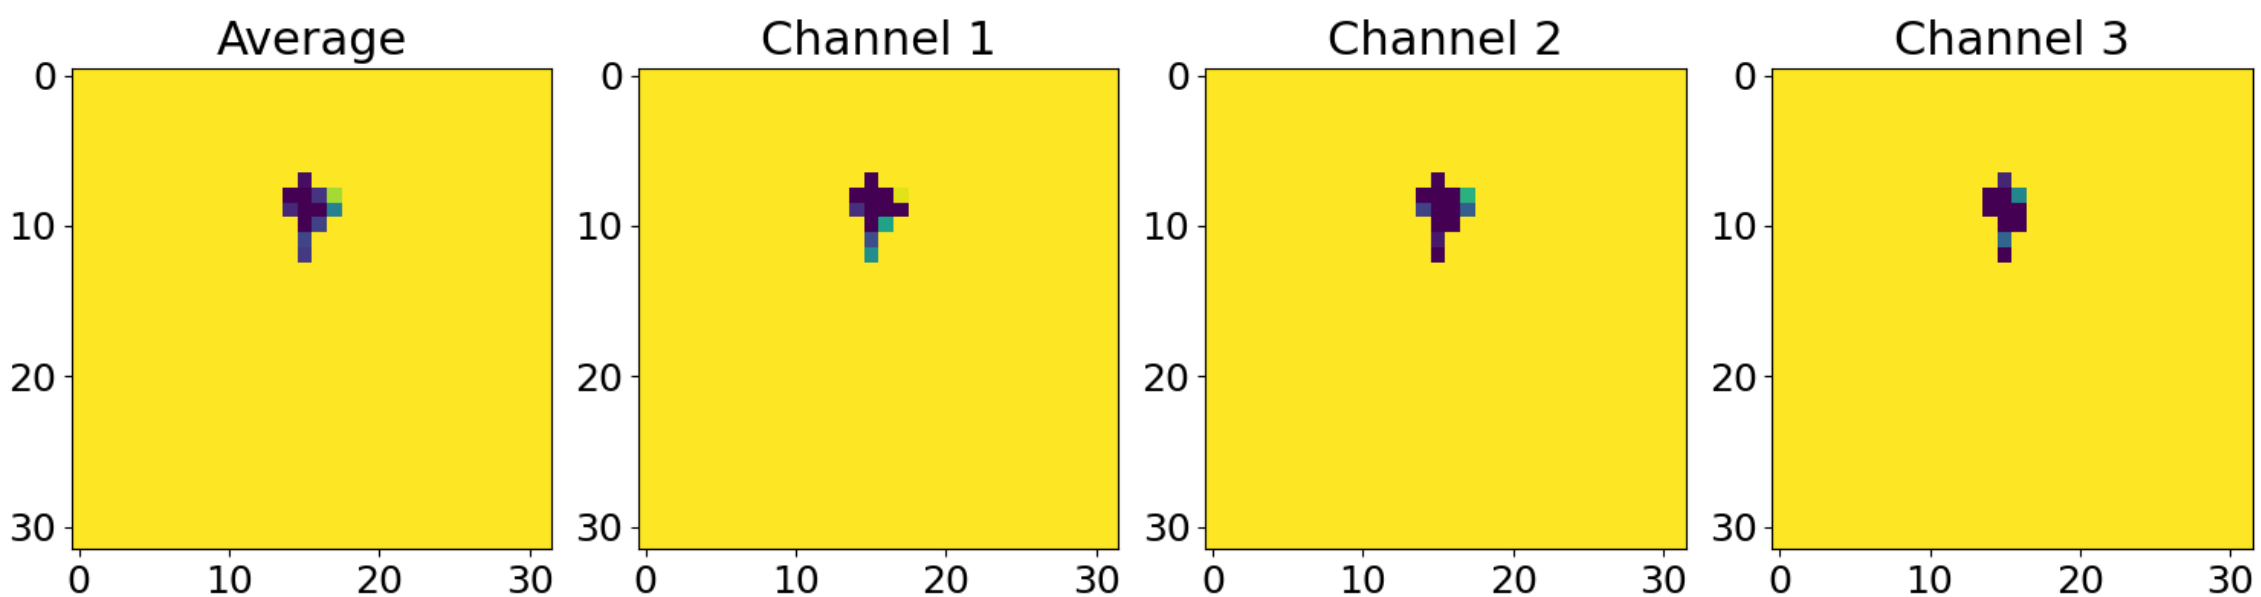

## Feature map after Poisson coding layer

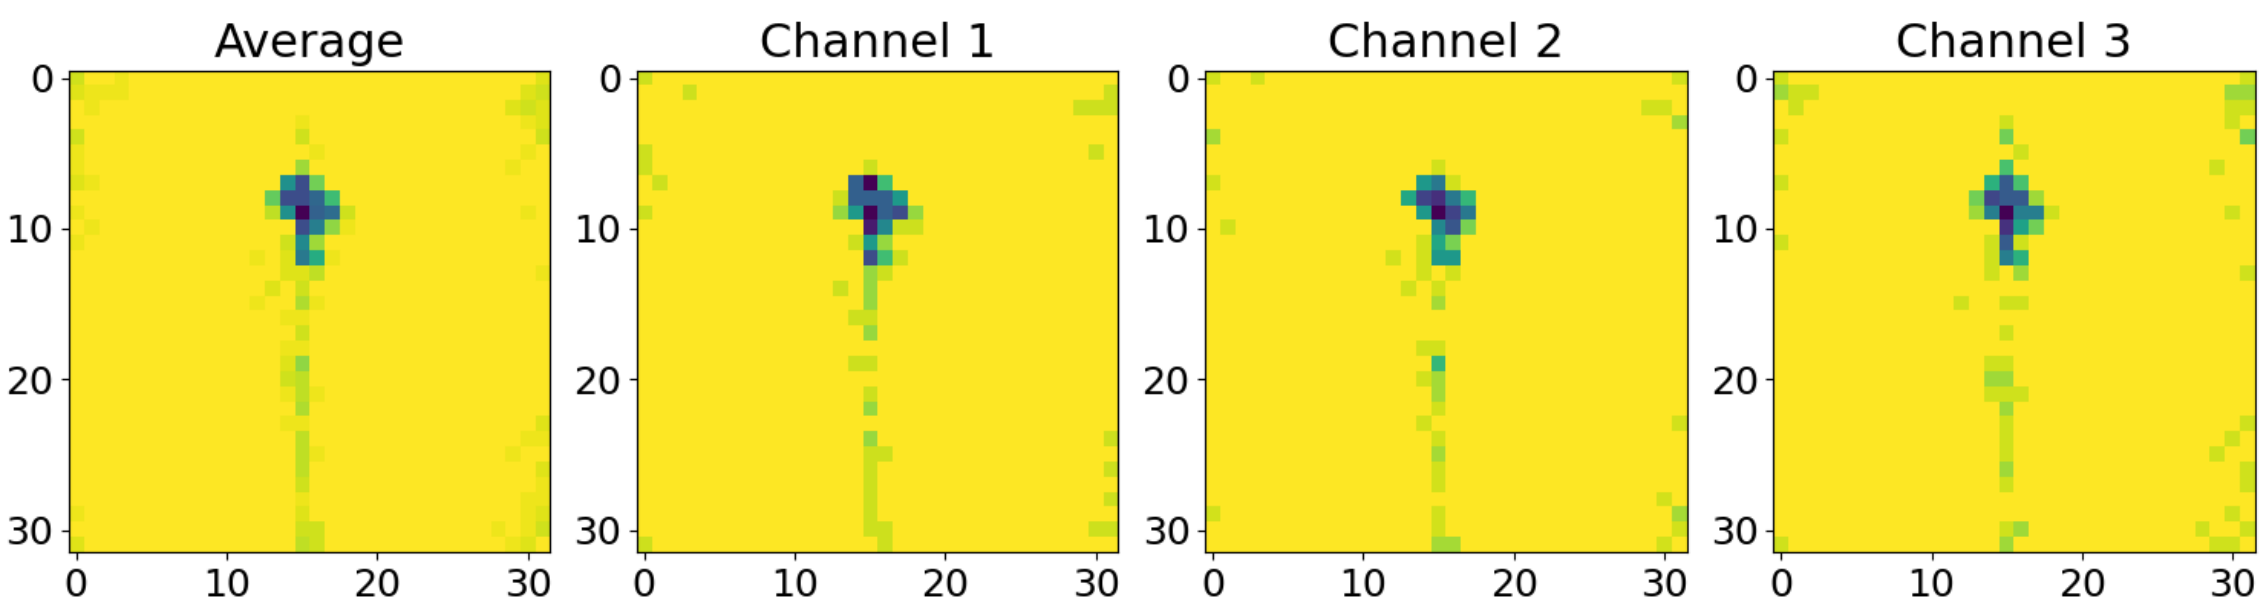

(a)

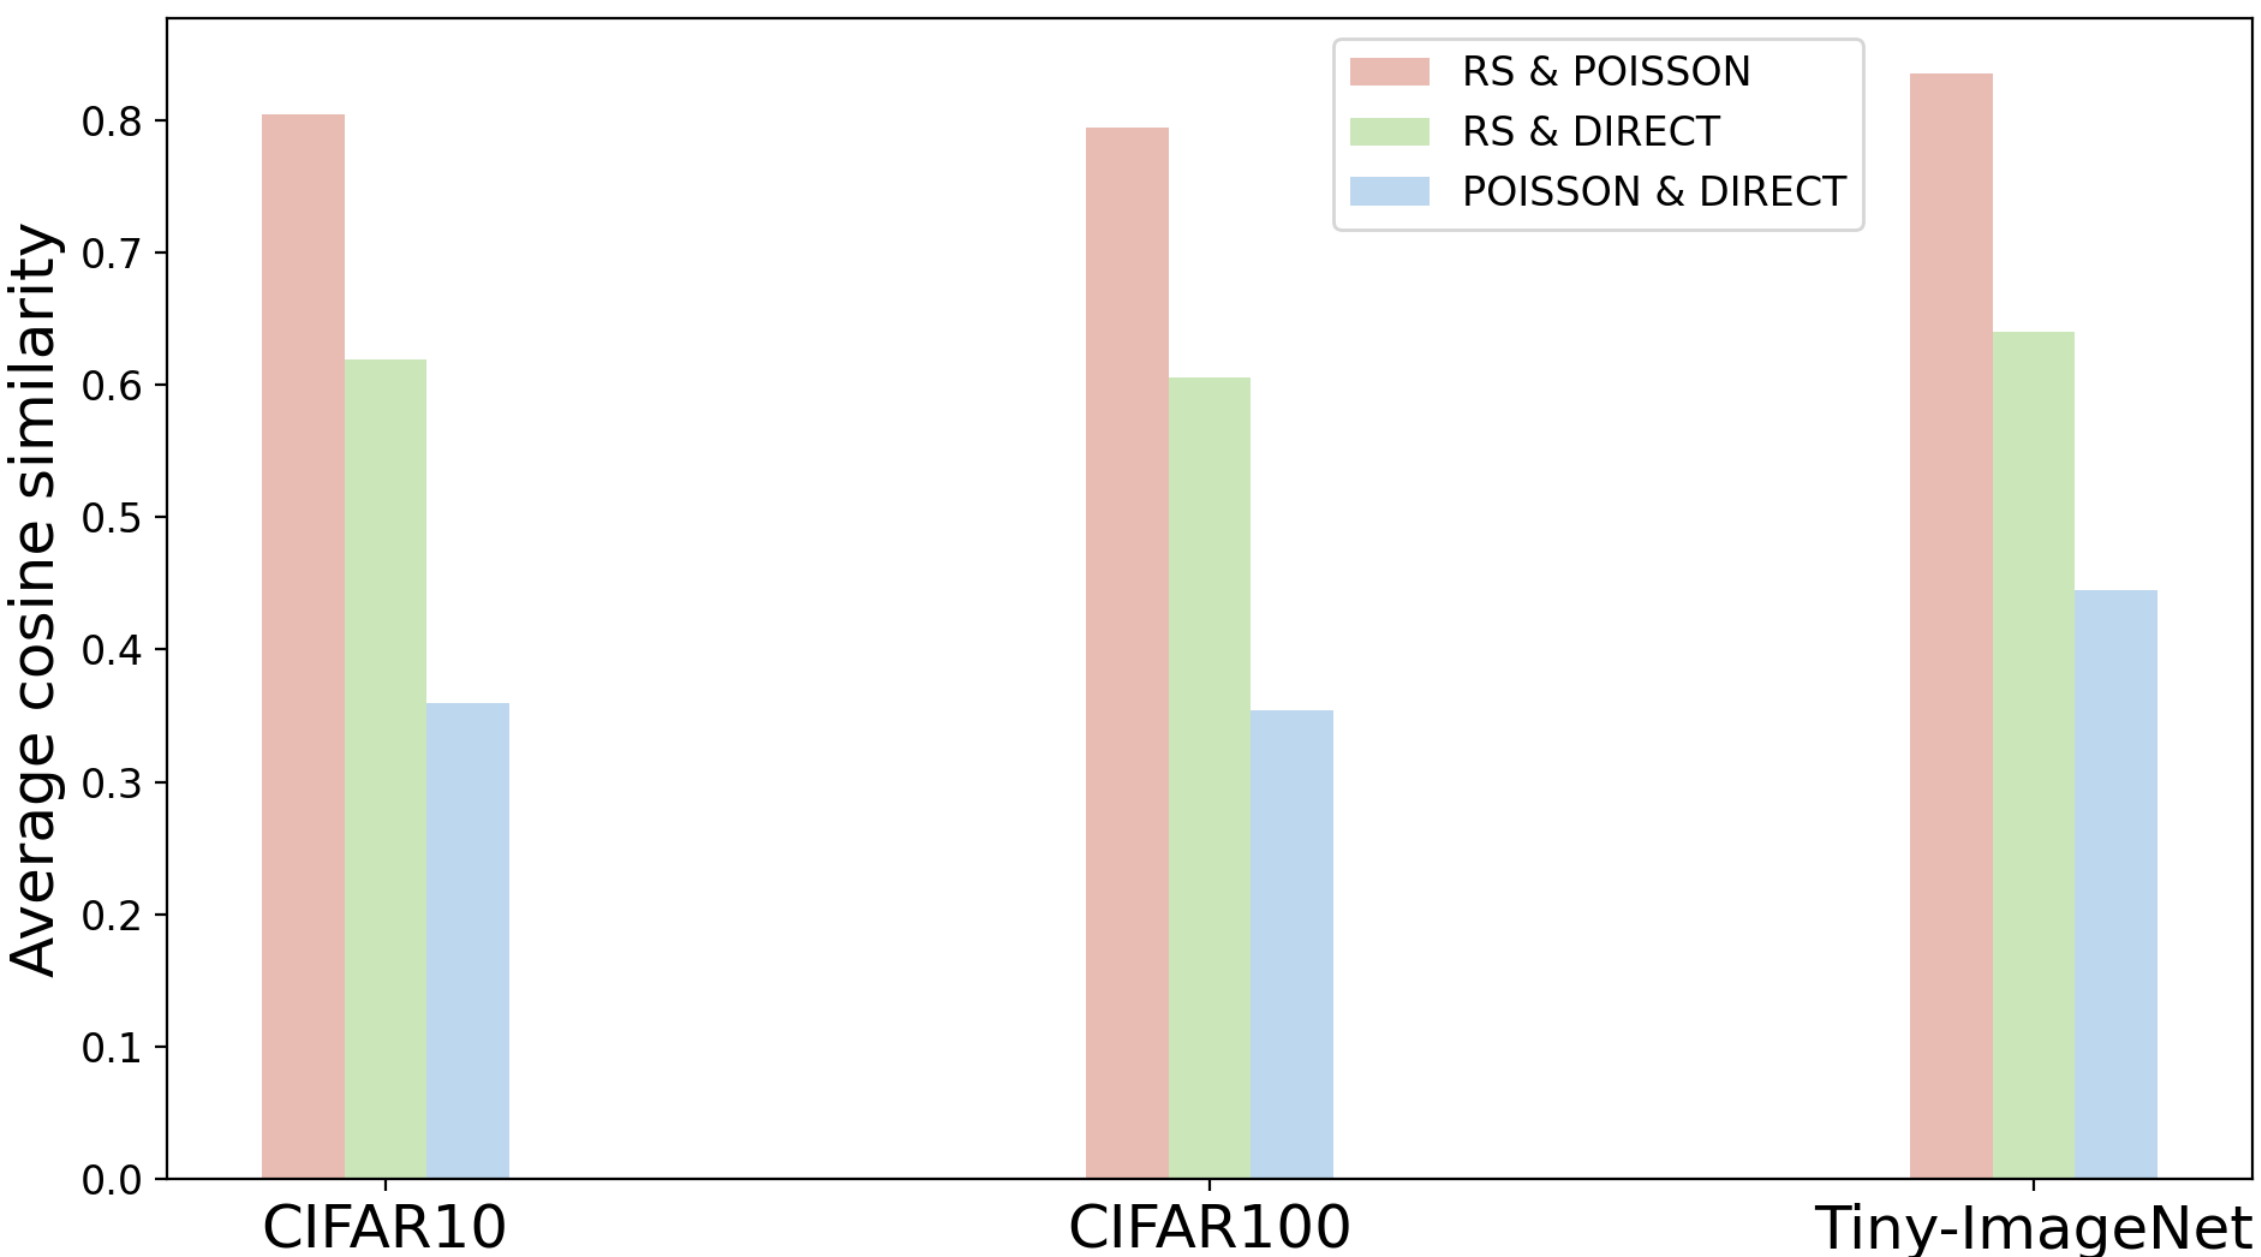

(b)

Supplement: supplementary_material [file attachment]
